# Supplementary material for: PAR4 (Protease-Activated Receptor 4) Antagonism With BMS-986120 Inhibits Human Ex Vivo Thrombus Formation
Source: PubMed Central journal article supplement (PMC5779320; doi:10.1161/atvbaha.117.310104), 2018-01-24

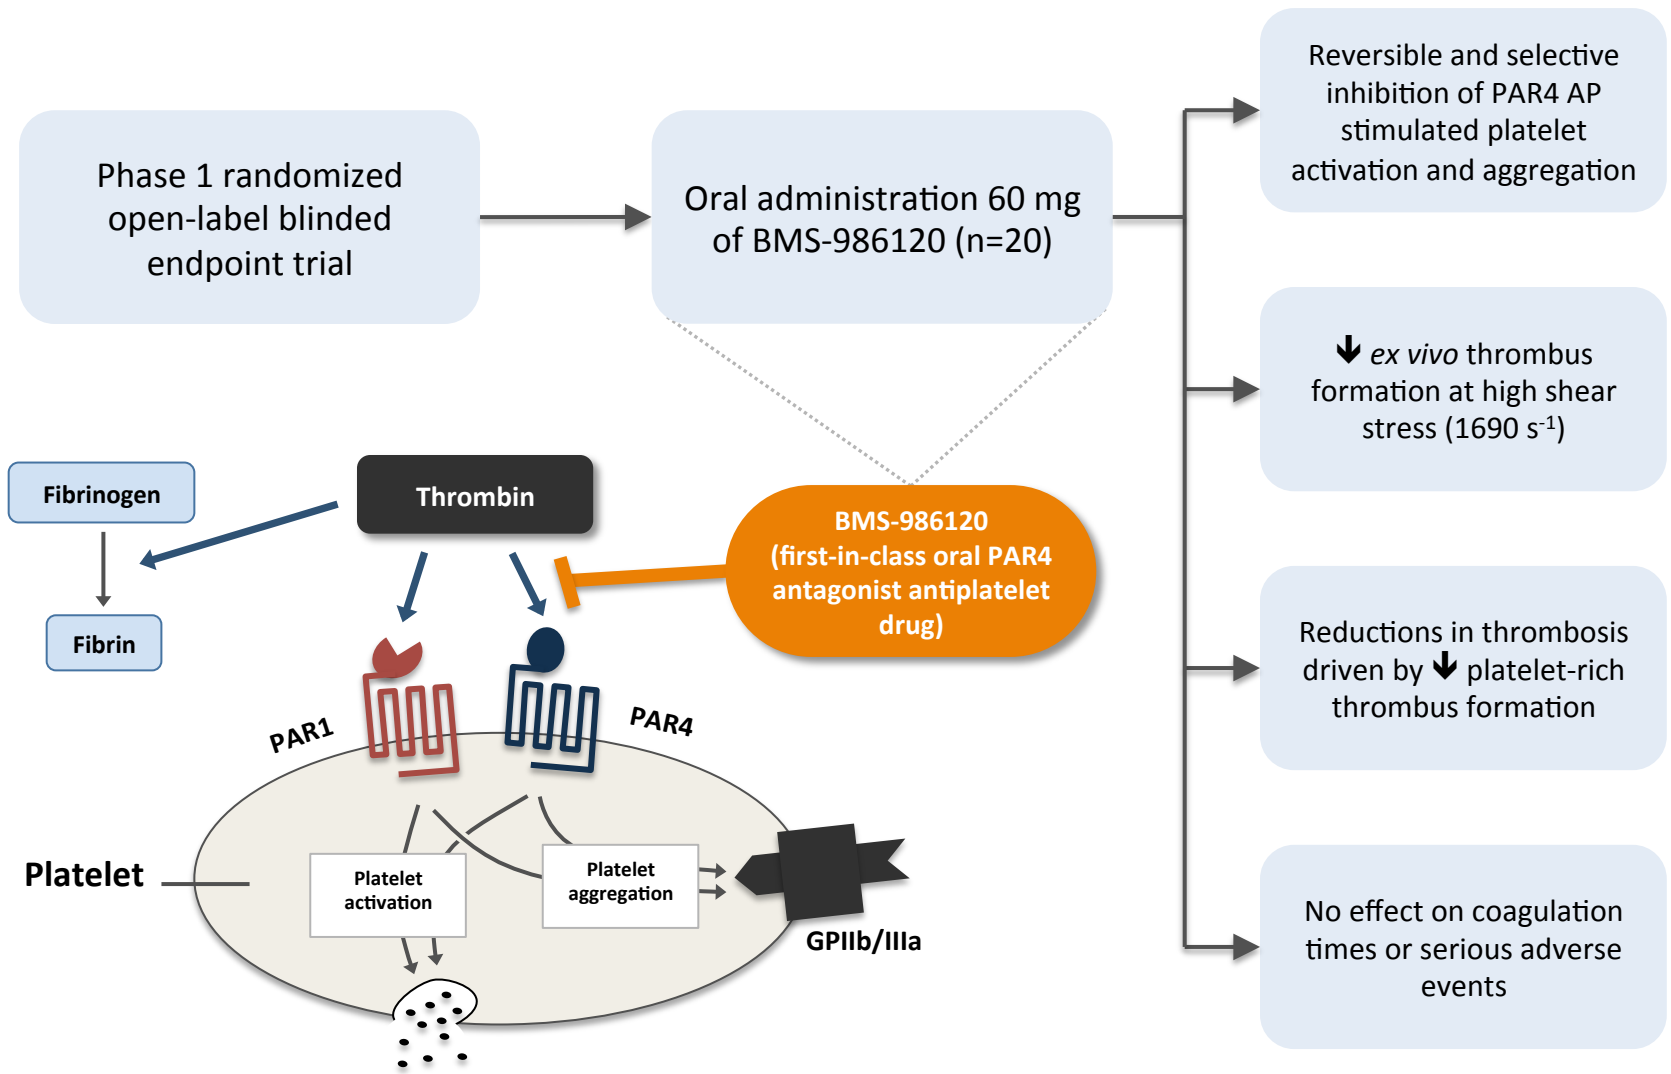

Supplement: atv-38-448-s003.pdf [file atv-38-448-s003.pdf]
